# Supplementary material for: Genomic divergences among cattle, dog and human estimated from large-scale alignments of genomic sequences
Source: PubMed Central journal article supplement (PMC1525190; doi:10.1186/1471-2164-7-140), 2006-06-07

## Supplemental Material

### **Figure S1. Optimization of Alignment Parameters.**

Using 5 randomly chosen cattle-dog-human orthologous pairs (03: contig 03.03, 06: contig 05.06, 12: contig 09.12, 45: contig 38.45, 81: contig 57.81), we tested a range of gap-opening penalty (GOP: -1500, -1250, -1000, -750, -400, -200, -100) and gap-extension penalty parameters (GEP: -50, -25, -10, -5, -1). For each parameter combination, we considered the effect on sequence similarity, sequence similarity counting each indel as one mismatch, the number of mismatches, and the number of indels. We also considered the correspondence of gaps and the position of young retrotransposition events. Parameters were favored (gap-opening penalty of -1000 and gap-extension penalty of -10) which simultaneously reduced the number of indels and mismatches, and which treated new retrotransposition events as a single event.

### **Figure S2. Cattle, Dog and Human Sequence and Alignment Properties.**

We obtained 84 qualified cattle-dog-human orthologous trios. For each alignment, a number of mutational properties such as branch length, pairwise REV ML distance, Kimura K2 distance, large indel frequency (>100 bp insertion/deletion event count per 10 kb) were compared. Other sequence properties such as GC%, SINE%, LINE% were also compared. Results varied within the expected levels of mammalian genome variation.

### **Table S3. Map Locations of Orthologous Trios in the Dog and Human Genome Assemblies.**

A. Within 84 cattle genomic clones obtained, 20 of the sequences mapped to human phylogenetic group chromosome 7. B. Index of how the 16 merged fasta files were compiled is shown in the agp file format.

### **Table S4. Substitution Rates of Ancestral Repeats in Cattle, Dog and Human.**

For each individual clone or contig, substitution rates were estimated by PAML from aligned ancestral repeats in cattle, dog and human. The average substitution rates were calculated for each chromosome according to the human genome placement.

### **Figure S5. Substitution Rate Variation.**

Scatter plots of overall substitution rates determined from non-overlapping 3000-bp (A) and 500-bp (B) sliding windows for cattle-dog-human multiple sequence alignments. Suboptimal alignments were excluded. The means and their standard deviations are shown.

Figure S1. Optimization of Alignment Parameters.  
Cattle-dog sequence alignments.

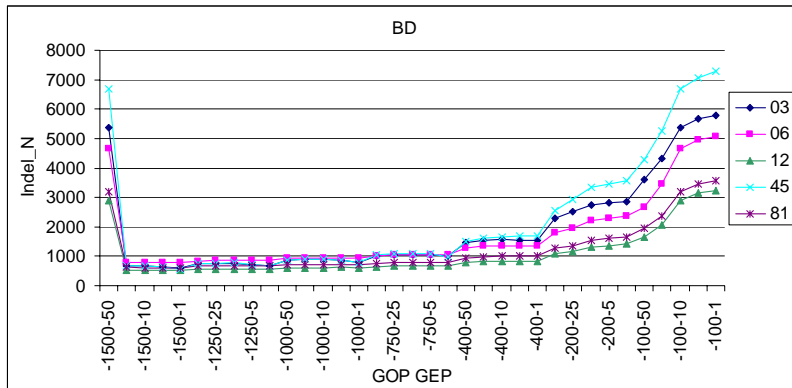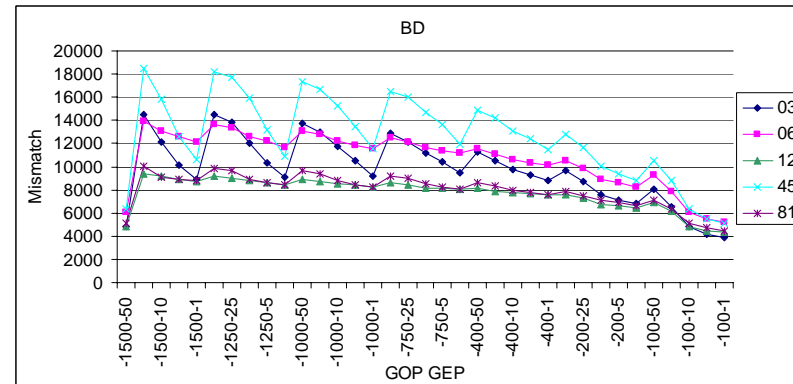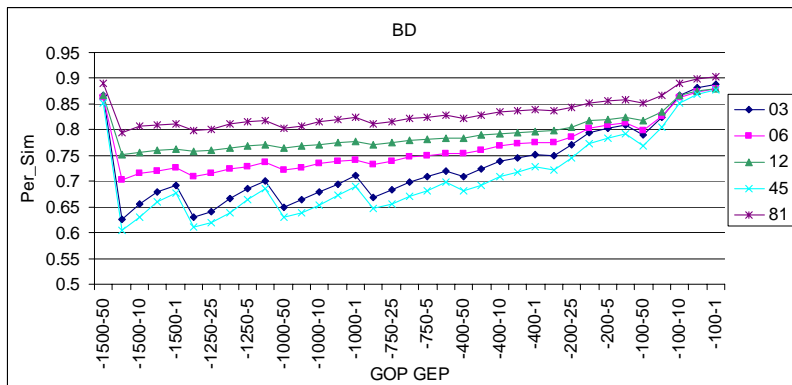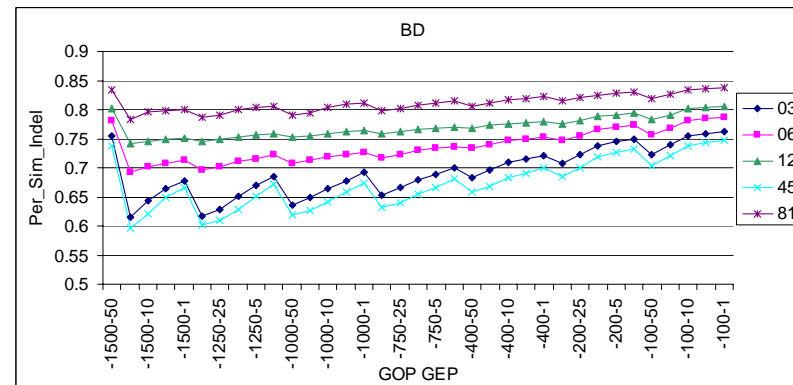

*Cattle-human sequence alignments.*

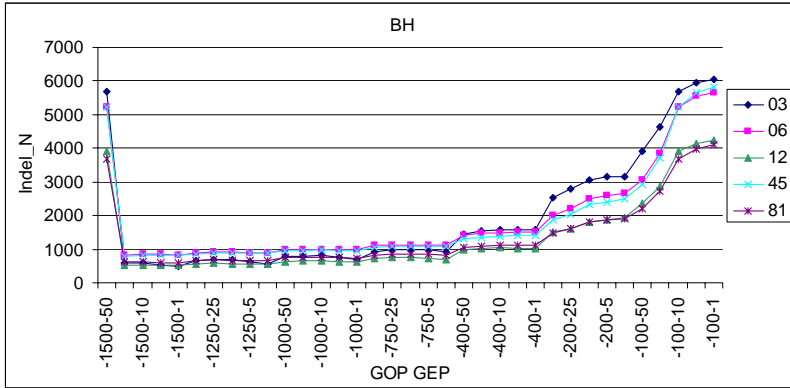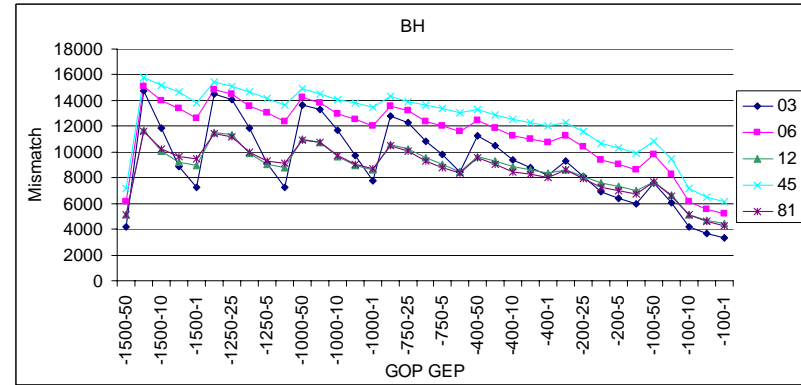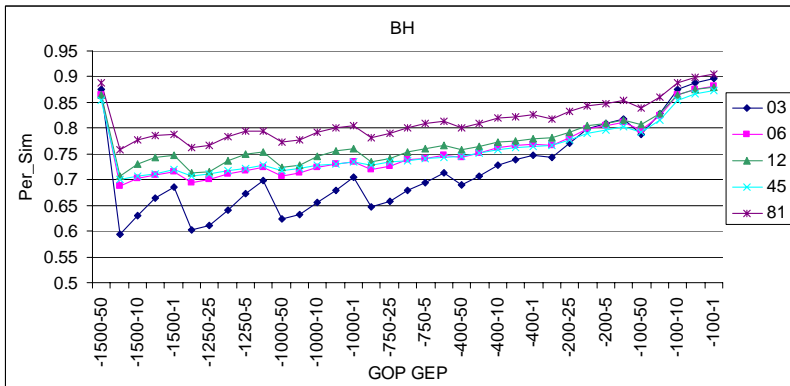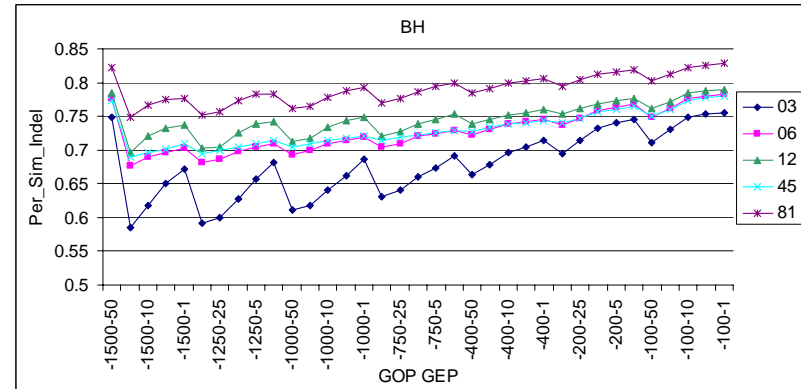

*Dog-human sequence alignments.*

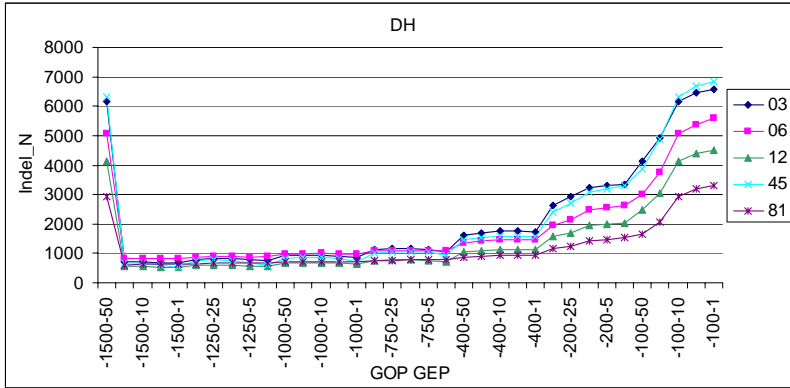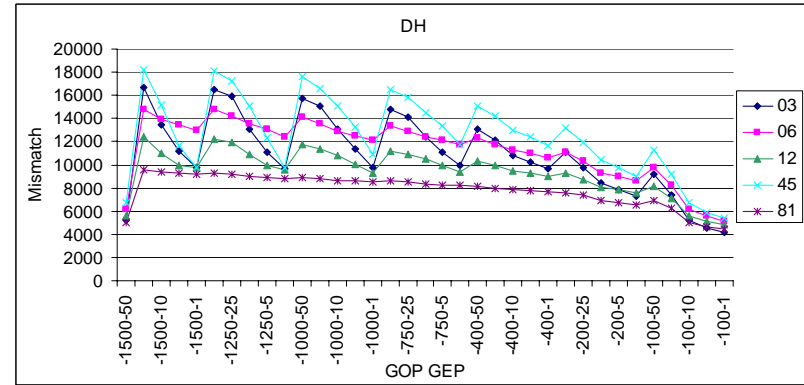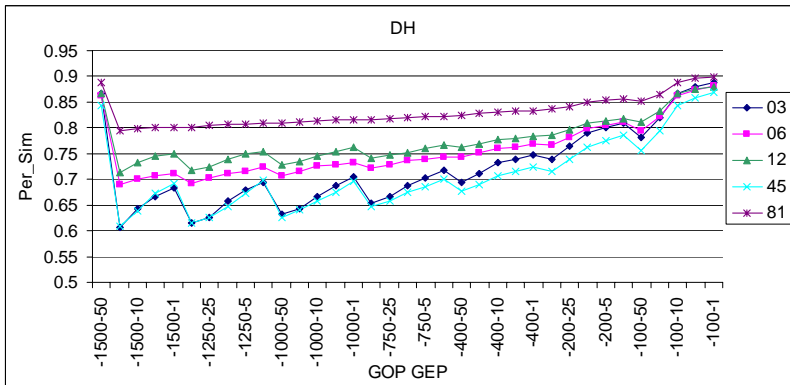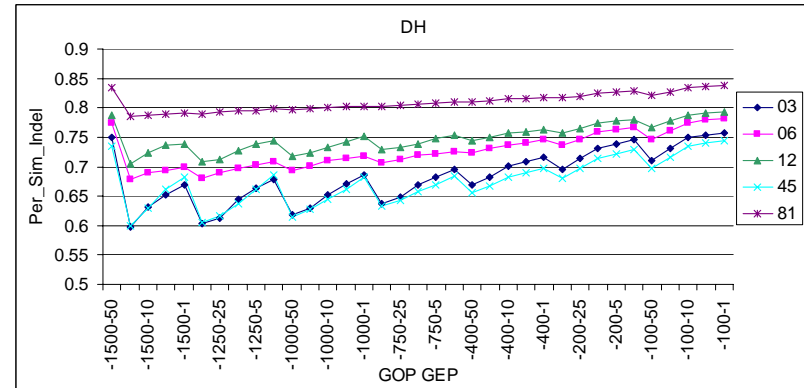

Figure S2. Cattle, Dog and Human Sequence and Alignment Properties.

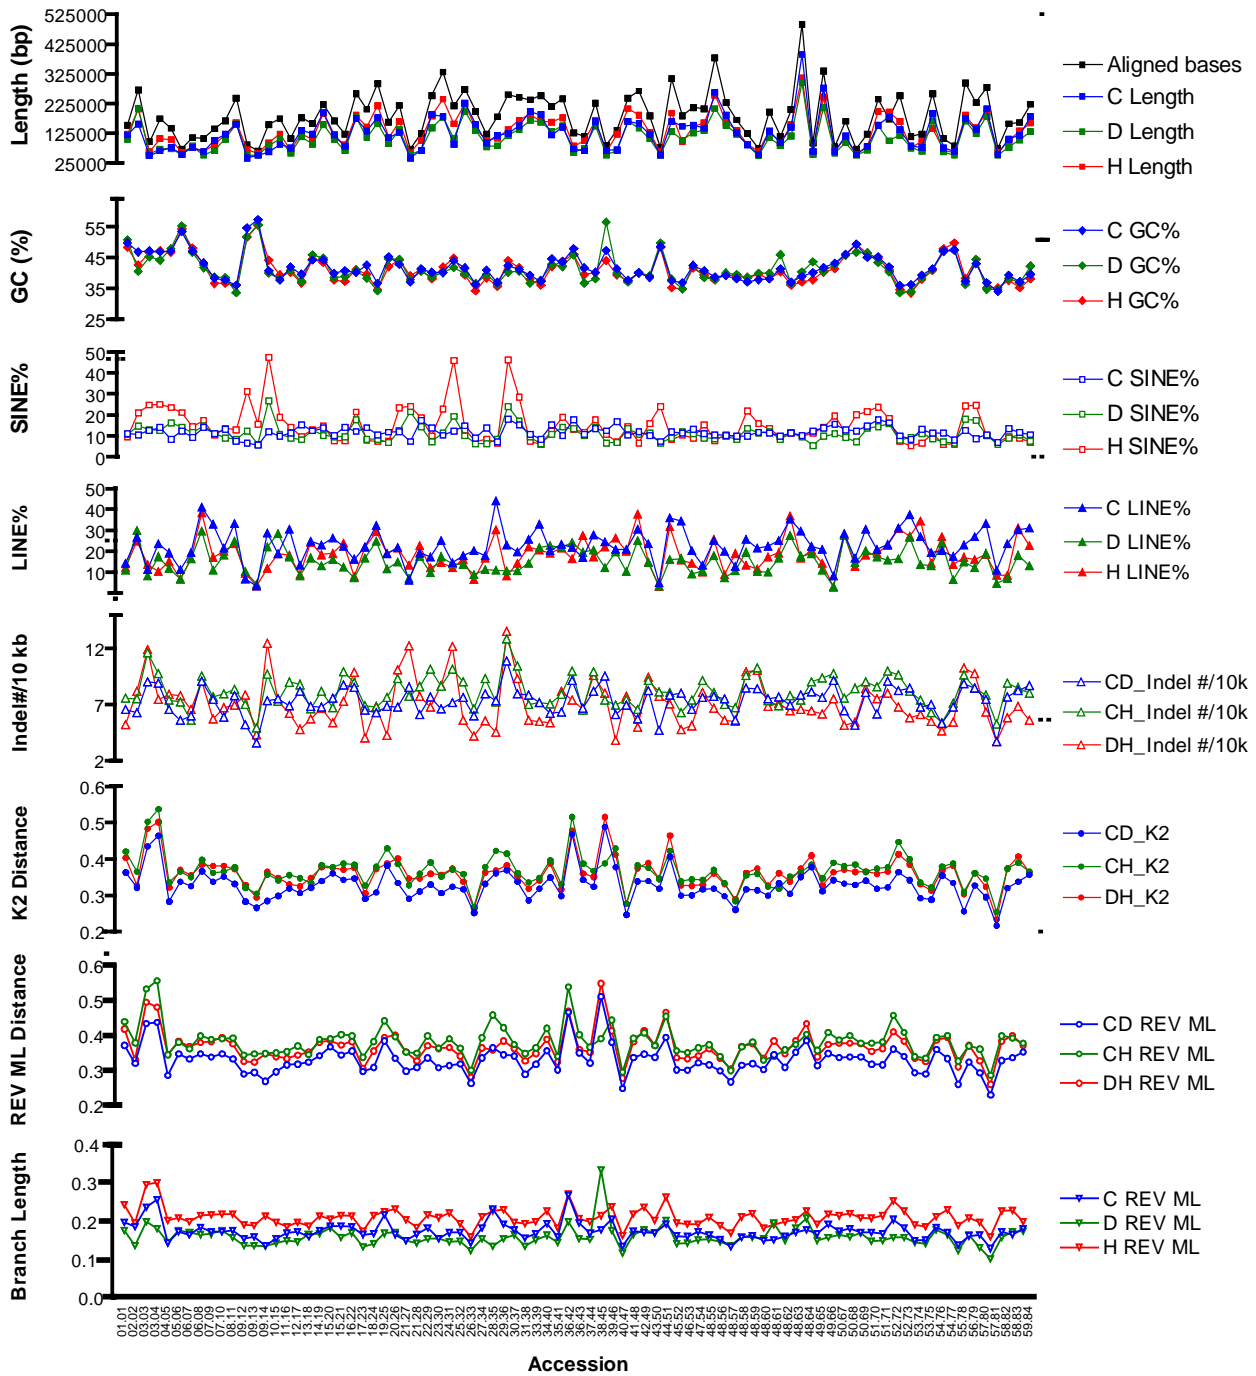

Table S3. Map Locations of Orthologous Trios in the Dog and Human Genome Assemblies.

A. Map Locations of Orthologous Trios

| No. | Clones       | Contig | Cattle Accession          |   | Dog canFam1               |   | Human hg17                |   |
|-----|--------------|--------|---------------------------|---|---------------------------|---|---------------------------|---|
|     |              |        | Positions and Orientation |   | Positions and Orientation |   | Positions and Orientation |   |
| 1   | RP42-459A17  | 01.01  | AC092193.4:100919-221188  | + | chr14:46029765-46135257   | + | chr7:30585342-30707957    | + |
| 2   | rp42-51p13   | 02.02  | AC103584.15:4869-162078   | - | chr26:26334081-26543457   | + | chr22:28760476-28966885   | + |
| 3   | rp42-513g13  | 03.03  | AC107065.5:32394-83065    | + | chr25:29108406-29051991   | - | chr8:11698086-11762835    | + |
| 4   | rp42-513g13  | 03.04  | AC107065.5:83274-150215   | + | chr25:29051337-28977709   | - | chr8:11763095-11870558    | + |
| 5   | RP42-518P7   | 04.05  | AC129959.6:131594-209300  | + | chr9:17538931-17613044    | + | chr17:44046521-44151615   | + |
| 6   | RP42-221D7   | 05.06  | AC136966.2:61682-116581   | - | chr9:18604343-18658651    | + | chr17:45339353-45401801   | + |
| 7   | CH240-600I3  | 06.07  | AC149665.2:71434-149517   | - | chr11:22065731-22148254   | + | chr5:131774510-131854613  | + |
| 8   | CH240-600I3  | 06.08  | AC149665.2:1796-66637     | - | chr11:22153608-22206679   | + | chr5:131859832-131923598  | + |
| 9   | CH240-57J21  | 07.09  | AC149669.2:124272-226591  | - | chr5:89383193-89314559    | - | chr16:60818827-60906505   | + |
| 10  | CH240-57J21  | 07.10  | AC149669.2:333-122665     | - | chr5:89311839-89205021    | - | chr16:60906795-61025689   | + |
| 11  | CH240-248M14 | 08.11  | AC149720.2:11424-167172   | + | chr25:9747993-10391281    | + | chr13:32082240-32244382   | + |
| 12  | CH240-361I2  | 09.12  | AC149756.4:130172-173471  | - | chr20:42342815-42290653   | - | chr3:49792479-49862644    | + |
| 13  | CH240-361I2  | 09.13  | AC149756.4:73985-125954   | - | chr20:42285949-42233885   | - | chr3:49868199-49925447    | + |
| 14  | CH240-361I2  | 09.14  | AC149756.4:6067-68813     | - | chr20:42218256-42135476   | - | chr3:49940788-50034633    | + |
| 15  | CH240-53K11  | 10.15  | AC149763.5:60855-148984   | + | chr25:10785849-10678516   | - | chr13:31775704-31899466   | + |
| 16  | CH240-12E22  | 11.16  | AC149769.2:3063-80460     | + | chr13:20515866-20574455   | + | chr8:119213679-119283057  | + |
| 17  | CH240-9E7    | 12.17  | AC149778.2:748-136557     | + | chr7:62809814-63496620    | + | chr18:23782859-23905738   | + |
| 18  | CH240-5F6    | 13.18  | AC149779.3:1294-125301    | - | chr24:22701407-22611789   | - | chr20:1137105-1242156     | + |
| 19  | CH240-6M21   | 14.19  | AC149782.2:638-196267     | + | chr34:22075090-22229562   | + | chr3:187540018-187733482  | + |
| 20  | CH240-3K17   | 15.20  | AC149783.2:32-121081      | + | chr7:63844657-63738049    | - | chr18:23519681-23632424   | + |
| 21  | CH240-3K17   | 15.21  | AC149783.2:121141-202657  | + | chr7:63735650-63668564    | - | chr18:23632488-23720071   | + |
| 22  | CH240-308E11 | 16.22  | AC150482.2:2477-177631    | - | chr20:28377373-28198847   | - | chr3:65775307-65961148    | + |
| 23  | CH240-466B8  | 17.23  | AC150488.2:985-134509     | - | chr14:19660232-19772043   | + | chr7:90595511-90741190    | + |
| 24  | CH240-454H24 | 18.24  | AC150492.2:2310-181487    | + | chr14:27800487-27959739   | + | chr7:9840649-10059060     | + |
| 25  | CH240-105M18 | 19.25  | AC150499.3:92163-203536   | - | chr5:6769079-6677660      | - | chr11:130586482-130697937 | + |
| 26  | CH240-319N17 | 20.26  | AC150512.3:1350-129979    | + | chr3:65262399-65925035    | + | chr4:17282199-17447839    | + |
| 27  | CH240-161G19 | 21.27  | AC150517.3:37210-80100    | + | chr13:51786601-51840848   | + | chr4:57152301-57212925    | + |
| 28  | CH240-161G19 | 21.28  | AC150517.3:111912-180359  | + | chr13:51884839-51953168   | + | chr4:57254710-57356795    | + |
| 29  | CH240-89P8   | 22.29  | AC150524.3:362-188772     | + | chr1:22891628-23548122    | + | chr18:50581215-50766301   | + |
| 30  | CH240-86O22  | 23.30  | AC150530.4:1821-183948    | + | chr12:67878733-68058426   | + | chr6:108233325-108473815  | + |

|    |              |       |                         |   |                         |   |                           |   |
|----|--------------|-------|-------------------------|---|-------------------------|---|---------------------------|---|
| 31 | CH240-382E8  | 24.31 | AC150542.2:1139-89971   | + | chr1:32238245-32479376  | + | chr22:30070900-30228829   | + |
| 32 | CH240-184G17 | 25.32 | AC150561.4:12-227300    | + | chr13:20618770-20818692 | + | chr8:119333111-119558332  | + |
| 33 | CH240-223K16 | 26.33 | AC150569.2:6411-162071  | + | chr14:56306856-56442732 | + | chr7:113799894-113940178  | + |
| 34 | CH240-238N22 | 27.34 | AC150573.4:71-92671     | - | chr1:15978104-15897283  | - | chr18:59979761-60081474   | + |
| 35 | CH240-237H4  | 28.35 | AC150574.2:16524-135281 | + | chr7:50215621-50132127  | - | chr18:39047293-39157065   | + |
| 36 | CH240-268P24 | 29.36 | AC150577.4:605-125168   | - | chr12:38447781-38566611 | + | chr6:74201469-74340188    | + |
| 37 | CH240-448P19 | 30.37 | AC150635.4:651-151762   | - | chr20:25390466-25252853 | - | chr3:69344360-69513654    | + |
| 38 | CH240-223I2  | 31.38 | AC150644.4:1043-199457  | - | chr14:11872632-11704042 | - | chr7:126130176-126318814  | + |
| 39 | CH240-443I13 | 33.39 | AC150674.4:3633-192027  | - | chr14:56758901-56922307 | + | chr7:114308522-114473710  | + |
| 40 | CH240-451M14 | 34.40 | AC150675.2:51176-171337 | - | chr17:14911000-15043125 | + | chr2:16338506-16502117    | + |
| 41 | CH240-151A24 | 35.41 | AC150690.7:606-147383   | - | chr21:34626826-34777799 | + | chr11:8992079-9170005     | + |
| 42 | CH240-275I24 | 36.42 | AC150707.3:39753-112994 | - | chr25:12866898-12804534 | - | chr13:29591596-29674106   | + |
| 43 | CH240-275I24 | 36.43 | AC150707.3:791-67489    | - | chr25:12399029-12731304 | + | chr13:29650317-29750771   | + |
| 44 | CH240-288E20 | 37.44 | AC150752.4:682-165588   | - | chr13:51490153-51641017 | + | chr4:56813280-56981839    | + |
| 45 | CH240-283G19 | 38.45 | AC150753.3:51450-119516 | - | chr15:11052670-10999201 | - | chr1:33820824-33883038    | + |
| 46 | CH240-472P12 | 39.46 | AC150855.6:36600-107393 | + | chr1:16184688-16117617  | - | chr18:59686006-59808307   | + |
| 47 | CH240-431L22 | 40.47 | AC150858.4:407-165819   | + | chr14:42581267-42748157 | + | chr7:26592673-26801337    | + |
| 48 | CH240-316E7  | 41.48 | AC150871.4:6457-164609  | - | chr19:34524774-35180988 | + | chr2:117975790-118162677  | + |
| 49 | CH240-491H11 | 42.49 | AC150879.3:379-122583   | - | chr31:36217864-36325326 | + | chr21:39445543-39574172   | + |
| 50 | CH240-483B20 | 43.50 | AC150887.4:57772-111059 | - | chr37:27886769-27939902 | + | chr2:218907788-218972107  | + |
| 51 | CH240-475A10 | 44.51 | AC150888.5:3021-168040  | + | chr26:36002667-36670894 | + | chr10:54950334-55144694   | + |
| 52 | CH240-186K21 | 45.52 | AC150993.4:32482-181986 | - | chr27:16358967-16256152 | - | chr12:38934819-39032016   | + |
| 53 | CH240-293H4  | 46.53 | AC151060.4:437-153612   | - | chr37:29316225-29444020 | + | chr2:220577954-220725201  | + |
| 54 | CH240-106N15 | 47.54 | AC151132.3:27576-170686 | + | chr31:30308504-30445036 | + | chr21:32893422-33055419   | + |
| 55 | RP42         | 48.55 | cow_01:85480-348895     | + | chr14:57799075-58007894 | + | chr7:115480168-115733738  | + |
| 56 | RP42         | 48.56 | cow_01:355838-542123    | + | chr14:58015451-58168204 | + | chr7:115742150-115905575  | + |
| 57 | RP42         | 48.57 | cow_01:543889-670944    | + | chr14:58168824-58291520 | + | chr7:115907285-116042703  | + |
| 58 | RP42         | 48.58 | cow_01:733214-820313    | + | chr14:58333594-58421805 | + | chr7:116097634-116187129  | + |
| 59 | RP42         | 48.59 | cow_01:822336-876202    | + | chr14:58423892-58474186 | + | chr7:116189100-116253984  | + |
| 60 | RP42         | 48.60 | cow_01:876855-1007769   | + | chr14:58474644-58586519 | + | chr7:116254629-116389704  | + |
| 61 | RP42         | 48.61 | cow_01:1009037-1104164  | + | chr14:58591386-58675495 | + | chr7:116391065-116482842  | + |
| 62 | RP42         | 48.62 | cow_01:1172107-1319065  | + | chr14:58742655-58859228 | + | chr7:116558438-116713593  | + |
| 63 | RP42         | 48.63 | cow_01:1319161-1710055  | + | chr14:58859726-59155670 | + | chr7:116713683-117025856  | + |
| 64 | RP42         | 48.64 | cow_01:1710263-1774889  | + | chr14:59156241-59211767 | + | chr7:117026088-117090776  | + |
| 65 | CH240        | 49.65 | cow_05:1211-278261      | + | chr13:20088716-20300722 | + | chr8:118731516-118978613  | + |
| 66 | CH240        | 49.66 | cow_05:278374-341917    | + | chr13:20301496-20360734 | + | chr8:118979511-119046512  | + |
| 67 | CH240        | 50.67 | cow_06:2735-119317      | + | chr5:19943353-19848448  | - | chr11:115953186-116065379 | + |

|    |       |       |                      |   |                         |   |                           |   |
|----|-------|-------|----------------------|---|-------------------------|---|---------------------------|---|
| 68 | CH240 | 50.68 | cow_06:124178-178472 | + | chr5:19842956-19790929  | - | chr11:116072131-116127882 | + |
| 69 | CH240 | 50.69 | cow_06:178942-260254 | + | chr5:19788444-19719670  | - | chr11:116128658-116209756 | + |
| 70 | CH240 | 51.70 | cow_08:94-153739     | + | chr10:33870374-33718167 | - | chr22:31579088-31778013   | + |
| 71 | CH240 | 51.71 | cow_08:154879-336475 | + | chr10:33717034-33616479 | - | chr22:31779065-31976875   | + |
| 72 | CH240 | 52.72 | cow_09:28256-165788  | + | chr10:56341700-56460458 | + | chr2:51642204-51807175    | + |
| 73 | CH240 | 52.73 | cow_09:175901-259328 | + | chr10:56465778-56544300 | + | chr2:51808934-51886339    | + |
| 74 | CH240 | 53.74 | cow_10:797-78322     | + | chr8:32759064-32824221  | + | chr14:53308621-53406357   | + |
| 75 | CH240 | 53.75 | cow_10:80935-273626  | + | chr8:32825669-32993955  | + | chr14:53408508-53550801   | + |
| 76 | CH240 | 54.76 | cow_11:191125-268498 | - | chr11:21628965-21691998 | + | chr5:131350907-131418895  | + |
| 77 | CH240 | 54.77 | cow_11:120648-185445 | - | chr11:21693757-21746116 | + | chr5:131420683-131479783  | + |
| 78 | CH240 | 55.78 | cow_12:24634-200470  | + | chrX:98470472-98638698  | + | chrX:122800129-122986208  | + |
| 79 | CH240 | 56.79 | cow_13:126517-265691 | + | chr4:25935619-26060162  | + | chr10:73478384-73621937   | + |
| 80 | CH240 | 57.80 | cow_14:63260-272010  | - | chr14:55957811-56140762 | + | chr7:113414403-113609271  | + |
| 81 | CH240 | 57.81 | cow_14:2551-58567    | - | chr14:56143921-56196551 | + | chr7:113612734-113675142  | + |
| 82 | CH240 | 58.82 | cow_15:4368-110889   | + | chrX:79450003-79882515  | + | chr16:61254379-61354977   | + |
| 83 | CH240 | 58.83 | cow_15:111211-230644 | + | chr5:88971363-88867442  | - | chr16:61355350-61489892   | + |
| 84 | RP42  | 59.84 | cow_16:2220-185260   | + | chr14:59238068-59368896 | + | chr7:117118972-117278620  | + |

---



*B. Index of compilation of 16 assembled fasta files.*

| Contigs | Begin   | End     | Part No | Type | Accession   | Acc Begin | Acc End | Orientation | Clones       |
|---------|---------|---------|---------|------|-------------|-----------|---------|-------------|--------------|
| cow_01  | 1       | 120491  | 1       | F    | AC146966.3  | 1         | 120491  | +           | RP42-139G14  |
| cow_01  | 120492  | 222858  | 2       | F    | AC156365.3  | 1         | 102367  | +           | RP42-18L9    |
| cow_01  | 222859  | 382810  | 3       | F    | AC090976.2  | 1         | 159952  | +           | RP42-400M23  |
| cow_01  | 382811  | 462244  | 4       | F    | AC090961.2  | 15011     | 94444   | +           | RP42-552E5   |
| cow_01  | 462245  | 600007  | 5       | F    | AC087843.2  | 19403     | 157165  | +           | RP42-550C12  |
| cow_01  | 600008  | 794202  | 6       | F    | AC087860.2  | 9502      | 203696  | +           | RP42-135P2   |
| cow_01  | 794203  | 915759  | 7       | F    | AC089991.2  | 37640     | 159196  | +           | RP42-194K3   |
| cow_01  | 915760  | 1081208 | 8       | F    | AC090031.2  | 48393     | 213841  | +           | RP42-341K3   |
| cow_01  | 1081209 | 1097160 | 9       | F    | AC122112.2  | 3689      | 19640   | +           | RP42-332L24  |
| cow_01  | 1097161 | 1259903 | 10      | F    | AC091728.2  | 1         | 162743  | +           | RP42-99M11   |
| cow_01  | 1259904 | 1376087 | 11      | F    | AC089992.2  | 31739     | 147922  | +           | RP42-210F11  |
| cow_01  | 1376088 | 1529357 | 12      | F    | AC089993.2  | 9590      | 162859  | +           | RP42-553M7   |
| cow_01  | 1529358 | 1703603 | 13      | F    | AC091252.3  | 9138      | 183383  | +           | RP42-324C24  |
| cow_01  | 1703604 | 1775989 | 14      | F    | AC156366.3  | 19336     | 91721   | +           | RP42-304J18  |
| cow_02  | 1       | 216538  | 1       | F    | AC092496.3  | 1         | 216538  | +           | RP42-394P20  |
| cow_02  | 216539  | 355780  | 2       | F    | AC091660.2  | 33827     | 173068  | +           | RP42-354B6   |
| cow_03  | 1       | 43157   | 1       | F    | AC098686.11 | 164686    | 121530  | -           | rp42-146c17  |
| cow_03  | 43158   | 234878  | 2       | F    | AC096629.10 | 4         | 191724  | +           | rp42-152a4   |
| cow_03  | 234879  | 365613  | 3       | F    | AC092858.21 | 34856     | 165590  | +           | rp42-147e22  |
| cow_04  | 1       | 199710  | 1       | F    | AC151117.4  | 1         | 199710  | +           | CH240-85N4   |
| cow_04  | 199711  | 274841  | 2       | F    | AC149645.4  | 75131     | 1       | -           | CH240-50L4   |
| cow_05  | 1       | 116055  | 1       | F    | AC150847.5  | 134331    | 18277   | -           | CH240-372I17 |
| cow_05  | 116056  | 291051  | 2       | F    | AC150881.4  | 1         | 174996  | +           | CH240-354J15 |
| cow_05  | 291052  | 372536  | 3       | F    | AC149676.2  | 86932     | 168416  | +           | CH240-43C16  |
| cow_06  | 1       | 65576   | 1       | F    | AC150916.3  | 158580    | 93005   | -           | CH240-309L24 |
| cow_06  | 65577   | 261763  | 2       | F    | AC149679.2  | 1         | 196187  | +           | CH240-27A8   |
| cow_07  | 1       | 176832  | 1       | F    | AC149683.2  | 1         | 176832  | +           | CH240-493H15 |
| cow_07  | 176833  | 281368  | 2       | F    | AC149717.2  | 104536    | 1       | -           | CH240-194N8  |
| cow_08  | 1       | 151547  | 1       | F    | AC149762.2  | 187366    | 35820   | -           | CH240-123C23 |
| cow_08  | 151548  | 337665  | 2       | F    | AC149694.2  | 1         | 186118  | +           | CH240-423C21 |
| cow_09  | 1       | 171707  | 1       | F    | AC149716.2  | 1         | 171707  | +           | CH240-31B10  |
| cow_09  | 171708  | 281423  | 2       | F    | AC150532.2  | 109716    | 1       | -           | CH240-105A12 |
| cow_10  | 1       | 126878  | 1       | F    | AC150687.3  | 144223    | 17346   | -           | CH240-243M2  |
| cow_10  | 126879  | 313794  | 2       | F    | AC149774.2  | 1         | 186916  | +           | CH240-10G15  |
| cow_11  | 1       | 171213  | 1       | F    | AC150515.3  | 1         | 171213  | +           | CH240-118E9  |
| cow_11  | 171214  | 268771  | 2       | F    | AC150860.4  | 97558     | 1       | -           | CH240-424I20 |
| cow_12  | 1       | 88090   | 1       | F    | AC150653.5  | 158246    | 70157   | -           | CH240-226L9  |
| cow_12  | 88091   | 252010  | 2       | F    | AC150694.2  | 1         | 163920  | +           | CH240-144A17 |
| cow_13  | 1       | 223559  | 1       | F    | AC150516.2  | 237116    | 13558   | -           | CH240-117L9  |
| cow_13  | 223560  | 394470  | 2       | F    | AC150866.2  | 1         | 170911  | +           | CH240-290G4  |
| cow_14  | 1       | 203152  | 1       | F    | AC150546.2  | 1         | 203152  | +           | CH240-77D21  |
| cow_14  | 203153  | 273777  | 2       | F    | AC150593.2  | 70625     | 1       | -           | CH240-105D16 |
| cow_15  | 1       | 158286  | 1       | F    | AC150664.2  | 1         | 158286  | +           | CH240-244O10 |
| cow_15  | 158287  | 232609  | 2       | F    | AC150919.6  | 74323     | 1       | -           | CH240-303F16 |
| cow_16  | 1       | 78774   | 1       | F    | AC156367.3  | 1         | 78774   | +           | RP42-394P24  |
| cow_16  | 78775   | 246694  | 2       | F    | AC146967.3  | 18692     | 186611  | +           | RP42-279M12  |

Table S4. *Substitution Rates of Ancestral Repeats in Cattle, Dog and Human.*

| Contig | Human hg17<br>Positions and Orientation | Alignment<br>Length | Substitution Rate (X10 <sup>-9</sup> change/site/year) |                      |                      |
|--------|-----------------------------------------|---------------------|--------------------------------------------------------|----------------------|----------------------|
|        |                                         |                     | Cattle                                                 | Dog                  | Human                |
| 38.45  | chr1:33820824-33883038                  | 86127               | 2.120 ± 0.082                                          | 3.860 ± 0.133        | 2.191 ± 0.080        |
|        | <b>Subtotal</b>                         | <b>86127</b>        | <b>2.120 ± 0.082</b>                                   | <b>3.860 ± 0.133</b> | <b>2.191 ± 0.080</b> |
| 34.40  | chr2:16338506-16502117                  | 216364              | 2.428 ± 0.061                                          | 2.087 ± 0.054        | 2.367 ± 0.058        |
| 52.72  | chr2:51642204-51807175                  | 251466              | 2.357 ± 0.060                                          | 2.041 ± 0.053        | 2.213 ± 0.054        |
| 52.73  | chr2:51808934-51886339                  | 114557              | 2.140 ± 0.135                                          | 2.320 ± 0.142        | 2.301 ± 0.140        |
| 41.48  | chr2:117975790-118162677                | 267904              | 2.051 ± 0.046                                          | 1.853 ± 0.042        | 2.014 ± 0.044        |
| 43.50  | chr2:218907788-218972107                | 78663               | 2.606 ± 0.077                                          | 2.094 ± 0.066        | 2.724 ± 0.078        |
| 46.53  | chr2:220577954-220725201                | 212712              | 2.714 ± 0.123                                          | 2.312 ± 0.110        | 2.661 ± 0.118        |
|        | <b>Subtotal</b>                         | <b>1141666</b>      | <b>2.340 ± 0.028</b>                                   | <b>2.036 ± 0.025</b> | <b>2.308 ± 0.027</b> |
| 09.12  | chr3:49792479-49862644                  | 86717               | 2.075 ± 0.049                                          | 1.998 ± 0.048        | 2.081 ± 0.049        |
| 09.13  | chr3:49868199-49925447                  | 66960               | 2.520 ± 0.184                                          | 1.611 ± 0.136        | 2.802 ± 0.198        |
| 09.14  | chr3:49940788-50034633                  | 154663              | 1.946 ± 0.133                                          | 1.931 ± 0.128        | 2.274 ± 0.145        |
| 16.22  | chr3:65775307-65961148                  | 258203              | 1.751 ± 0.070                                          | 1.766 ± 0.070        | 2.910 ± 0.069        |
| 30.37  | chr3:69344360-69513654                  | 246792              | 2.382 ± 0.061                                          | 2.348 ± 0.060        | 2.350 ± 0.058        |
| 14.19  | chr3:187540018-187733482                | 223181              | 2.255 ± 0.060                                          | 2.131 ± 0.058        | 2.187 ± 0.057        |
|        | <b>Subtotal</b>                         | <b>1036516</b>      | <b>2.164 ± 0.029</b>                                   | <b>2.078 ± 0.028</b> | <b>2.291 ± 0.029</b> |
| 20.26  | chr4:17282199-17447839                  | 219368              | 2.153 ± 0.060                                          | 1.981 ± 0.057        | 2.378 ± 0.063        |
| 37.44  | chr4:56813280-56981839                  | 227041              | 2.086 ± 0.059                                          | 2.069 ± 0.058        | 2.111 ± 0.057        |
| 21.27  | chr4:57152301-57212925                  | 73590               | 2.051 ± 0.131                                          | 2.090 ± 0.134        | 2.031 ± 0.127        |
| 21.28  | chr4:57254710-57356795                  | 124192              | 2.060 ± 0.078                                          | 1.852 ± 0.072        | 1.862 ± 0.069        |
|        | <b>Subtotal</b>                         | <b>644191</b>       | <b>2.105 ± 0.036</b>                                   | <b>1.993 ± 0.035</b> | <b>2.150 ± 0.035</b> |
| 54.76  | chr5:131350907-131418895                | 107648              | 2.202 ± 0.087                                          | 2.177 ± 0.086        | 2.121 ± 0.081        |
| 54.77  | chr5:131420683-131479783                | 82828               | 1.830 ± 0.087                                          | 2.180 ± 0.099        | 2.261 ± 0.099        |
| 06.07  | chr5:131774510-131854613                | 111195              | 1.998 ± 0.061                                          | 2.075 ± 0.063        | 1.975 ± 0.058        |
| 06.08  | chr5:131859832-131923598                | 108131              | 2.294 ± 0.080                                          | 1.996 ± 0.071        | 2.279 ± 0.075        |
|        | <b>Subtotal</b>                         | <b>409802</b>       | <b>2.089 ± 0.039</b>                                   | <b>2.089 ± 0.037</b> | <b>2.126 ± 0.037</b> |
| 29.36  | chr6:74201469-74340188                  | 255568              | 2.064 ± 0.057                                          | 1.893 ± 0.053        | 2.366 ± 0.061        |
| 23.30  | chr6:108233325-108473815                | 331897              | 2.577 ± 0.096                                          | 2.200 ± 0.087        | 2.698 ± 0.097        |
|        | <b>Subtotal</b>                         | <b>587465</b>       | <b>2.219 ± 0.049</b>                                   | <b>1.986 ± 0.046</b> | <b>2.467 ± 0.052</b> |
| 18.24  | chr7:9840649-10059060                   | 292357              | 1.969 ± 0.054                                          | 1.834 ± 0.051        | 2.150 ± 0.055        |
| 40.47  | chr7:26592673-26801337                  | 243369              | 2.408 ± 0.127                                          | 1.583 ± 0.094        | 1.994 ± 0.105        |
| 01.01  | chr7:30585342-30707957                  | 153592              | 2.371 ± 0.080                                          | 1.788 ± 0.065        | 2.020 ± 0.068        |
| 17.23  | chr7:90595511-90741190                  | 206463              | 2.237 ± 0.060                                          | 1.942 ± 0.054        | 2.232 ± 0.057        |
| 57.80  | chr7:113414403-113609271                | 278912              | 2.265 ± 0.058                                          | 2.007 ± 0.052        | 2.223 ± 0.054        |
| 57.81  | chr7:113612734-113675142                | 75813               | 1.986 ± 0.049                                          | 1.840 ± 0.047        | 1.955 ± 0.047        |
| 26.33  | chr7:113799894-113940178                | 199486              | 1.851 ± 0.058                                          | 1.864 ± 0.057        | 1.915 ± 0.056        |
| 33.39  | chr7:114308522-114473710                | 251364              | 1.998 ± 0.081                                          | 2.092 ± 0.083        | 2.264 ± 0.086        |
| 48.55  | chr7:115480168-115733738                | 379737              | 2.216 ± 0.124                                          | 1.788 ± 0.105        | 2.656 ± 0.144        |
| 48.56  | chr7:115742150-115905575                | 228138              | 1.933 ± 0.060                                          | 1.929 ± 0.060        | 1.812 ± 0.055        |
| 48.57  | chr7:115907285-116042703                | 170372              | 2.023 ± 0.072                                          | 2.584 ± 0.086        | 2.151 ± 0.073        |
| 48.58  | chr7:116097634-116187129                | 124172              | 1.983 ± 0.053                                          | 1.916 ± 0.051        | 2.002 ± 0.050        |
| 48.59  | chr7:116189100-116253984                | 74878               | 2.260 ± 0.047                                          | 2.282 ± 0.047        | 2.248 ± 0.046        |
| 48.60  | chr7:116254629-116389704                | 197714              | 2.351 ± 0.084                                          | 2.457 ± 0.086        | 2.303 ± 0.080        |
| 48.61  | chr7:116391065-116482842                | 114800              | 2.461 ± 0.072                                          | 2.227 ± 0.065        | 2.085 ± 0.060        |
| 48.62  | chr7:116558438-116713593                | 205213              | 2.047 ± 0.051                                          | 1.735 ± 0.046        | 2.181 ± 0.051        |
| 48.63  | chr7:116713683-117025856                | 491059              | 1.867 ± 0.055                                          | 1.558 ± 0.049        | 1.856 ± 0.052        |
| 48.64  | chr7:117026088-117090776                | 93027               | 2.386 ± 0.066                                          | 2.230 ± 0.064        | 2.367 ± 0.064        |
| 59.84  | chr7:117118972-117278620                | 223355              | 2.258 ± 0.070                                          | 1.745 ± 0.059        | 1.945 ± 0.061        |
| 31.38  | chr7:126130176-126318814                | 238636              | 2.236 ± 0.071                                          | 1.860 ± 0.063        | 2.388 ± 0.072        |

|       |                           |                |                      |                      |                      |
|-------|---------------------------|----------------|----------------------|----------------------|----------------------|
|       | <b>Subtotal</b>           | <b>4242457</b> | <b>2.142 ± 0.014</b> | <b>1.976 ± 0.013</b> | <b>2.126 ± 0.014</b> |
| 03.03 | chr8:11698086-11762835    | 97323          | 3.300 ± 0.173        | 2.371 ± 0.133        | 3.165 ± 0.165        |
| 03.04 | chr8:11763095-11870558    | 174511         | 3.104 ± 0.147        | 2.470 ± 0.123        | 2.848 ± 0.134        |
| 49.65 | chr8:118731516-118978613  | 333441         | 2.098 ± 0.042        | 1.863 ± 0.039        | 2.021 ± 0.041        |
| 49.66 | chr8:118979511-119046512  | 81166          | 2.486 ± 0.108        | 1.936 ± 0.098        | 2.280 ± 0.094        |
| 11.16 | chr8:119213679-119283057  | 108845         | 2.092 ± 0.067        | 1.992 ± 0.065        | 2.001 ± 0.059        |
| 25.32 | chr8:119333111-119558332  | 273031         | 2.151 ± 0.045        | 1.858 ± 0.040        | 2.099 ± 0.043        |
|       | <b>Subtotal</b>           | <b>1068317</b> | <b>2.258 ± 0.028</b> | <b>1.948 ± 0.024</b> | <b>2.169 ± 0.026</b> |
| 44.51 | chr10:54950334-55144694   | 308959         | 2.655 ± 0.102        | 2.610 ± 0.099        | 2.987 ± 0.112        |
| 56.79 | chr10:73478384-73621937   | 228934         | 2.202 ± 0.067        | 2.286 ± 0.070        | 2.350 ± 0.069        |
|       | <b>Subtotal</b>           | <b>537893</b>  | <b>2.372 ± 0.057</b> | <b>2.417 ± 0.058</b> | <b>2.583 ± 0.059</b> |
| 35.41 | chr11:8992079-9170005     | 242038         | 2.100 ± 0.052        | 1.969 ± 0.048        | 2.011 ± 0.048        |
| 50.67 | chr11:115953186-116065379 | 166340         | 2.163 ± 0.095        | 1.618 ± 0.077        | 2.012 ± 0.085        |
| 50.68 | chr11:116072131-116127882 | 73399          | 2.070 ± 0.067        | 1.972 ± 0.065        | 2.040 ± 0.064        |
| 50.69 | chr11:116128658-116209756 | 123764         | 2.669 ± 0.084        | 2.084 ± 0.070        | 2.342 ± 0.074        |
| 19.25 | chr11:130586482-130697937 | 163201         | 1.983 ± 0.045        | 1.836 ± 0.042        | 1.877 ± 0.042        |
|       | <b>Subtotal</b>           | <b>768742</b>  | <b>2.151 ± 0.028</b> | <b>1.916 ± 0.025</b> | <b>2.022 ± 0.025</b> |
| 45.52 | chr12:38934819-39032016   | 185076         | 2.207 ± 0.063        | 1.776 ± 0.054        | 2.080 ± 0.056        |
|       | <b>Subtotal</b>           | <b>185076</b>  | <b>2.207 ± 0.073</b> | <b>1.776 ± 0.060</b> | <b>2.080 ± 0.069</b> |
| 36.42 | chr13:29591596-29674106   | 127145         | 2.955 ± 0.114        | 2.201 ± 0.090        | 2.611 ± 0.100        |
| 36.43 | chr13:29650317-29750771   | 115102         | 2.705 ± 0.111        | 2.093 ± 0.090        | 2.283 ± 0.095        |
| 10.15 | chr13:31775704-31899466   | 174749         | 2.128 ± 0.075        | 1.899 ± 0.069        | 2.158 ± 0.072        |
| 08.11 | chr13:32082240-32244382   | 244312         | 2.304 ± 0.064        | 2.019 ± 0.059        | 2.347 ± 0.063        |
|       | <b>Subtotal</b>           | <b>661308</b>  | <b>2.451 ± 0.042</b> | <b>2.039 ± 0.037</b> | <b>2.337 ± 0.040</b> |
| 53.74 | chr14:53308621-53406357   | 123858         | 1.977 ± 0.064        | 1.901 ± 0.063        | 2.141 ± 0.059        |
| 53.75 | chr14:53408508-53550801   | 258669         | 2.053 ± 0.055        | 1.890 ± 0.052        | 2.015 ± 0.052        |
|       | <b>Subtotal</b>           | <b>382527</b>  | <b>2.018 ± 0.043</b> | <b>1.888 ± 0.041</b> | <b>2.055 ± 0.043</b> |
| 07.09 | chr16:60818827-60906505   | 140525         | 2.286 ± 0.087        | 2.236 ± 0.084        | 2.224 ± 0.081        |
| 07.10 | chr16:60906795-61025689   | 167605         | 2.337 ± 0.086        | 2.300 ± 0.082        | 2.261 ± 0.080        |
| 58.82 | chr16:61254379-61354977   | 158049         | 2.495 ± 0.100        | 2.169 ± 0.088        | 2.689 ± 0.104        |
| 58.83 | chr16:61355350-61489892   | 162397         | 2.217 ± 0.072        | 2.445 ± 0.076        | 2.599 ± 0.070        |
|       | <b>Subtotal</b>           | <b>628576</b>  | <b>2.323 ± 0.043</b> | <b>2.290 ± 0.042</b> | <b>2.433 ± 0.044</b> |
| 04.05 | chr17:44046521-44151615   | 142683         | 1.945 ± 0.086        | 1.863 ± 0.083        | 2.47 ± 0.100         |
| 05.06 | chr17:45339353-45401801   | 73205          | 2.095 ± 0.086        | 2.061 ± 0.084        | 1.833 ± 0.073        |
|       | <b>Subtotal</b>           | <b>215888</b>  | <b>2.011 ± 0.059</b> | <b>1.947 ± 0.058</b> | <b>2.128 ± 0.059</b> |
| 15.20 | chr18:23519681-23632424   | 167556         | 2.380 ± 0.081        | 2.443 ± 0.084        | 2.139 ± 0.071        |
| 15.21 | chr18:23632488-23720071   | 123625         | 2.659 ± 0.095        | 2.120 ± 0.080        | 2.224 ± 0.079        |
| 12.17 | chr18:23782859-23905738   | 177527         | 2.376 ± 0.076        | 2.036 ± 0.069        | 2.156 ± 0.068        |
| 28.35 | chr18:39047293-39157065   | 181140         | 3.227 ± 0.127        | 1.812 ± 0.100        | 2.621 ± 0.104        |
| 22.29 | chr18:50581215-50766301   | 252513         | 2.481 ± 0.072        | 2.013 ± 0.061        | 2.445 ± 0.069        |
| 39.46 | chr18:59686006-59808307   | 135578         | 2.871 ± 0.142        | 2.234 ± 0.114        | 2.688 ± 0.133        |
| 27.34 | chr18:59979761-60081474   | 122499         | 2.510 ± 0.113        | 2.336 ± 0.107        | 2.489 ± 0.111        |
|       | <b>Subtotal</b>           | <b>1160438</b> | <b>2.546 ± 0.035</b> | <b>2.137 ± 0.031</b> | <b>2.331 ± 0.032</b> |
| 13.18 | chr20:1137105-1242156     | 158641         | 1.895 ± 0.054        | 1.922 ± 0.054        | 1.929 ± 0.052        |
|       | <b>Subtotal</b>           | <b>158641</b>  | <b>1.895 ± 0.054</b> | <b>1.922 ± 0.054</b> | <b>1.929 ± 0.052</b> |
| 47.54 | chr21:32893422-33055419   | 207697         | 2.199 ± 0.067        | 1.937 ± 0.061        | 2.202 ± 0.065        |
| 42.49 | chr21:39445543-39574172   | 184694         | 2.286 ± 0.086        | 2.410 ± 0.089        | 2.835 ± 0.101        |
|       | <b>Subtotal</b>           | <b>392391</b>  | <b>2.241 ± 0.053</b> | <b>2.135 ± 0.052</b> | <b>2.462 ± 0.055</b> |
| 02.02 | chr22:28760476-28966885   | 271443         | 2.224 ± 0.048        | 1.758 ± 0.041        | 1.961 ± 0.043        |
| 24.31 | chr22:30070900-30228829   | 217929         | 2.189 ± 0.087        | 1.873 ± 0.078        | 2.861 ± 0.106        |
| 51.70 | chr22:31579088-31778013   | 240638         | 2.229 ± 0.042        | 1.764 ± 0.035        | 2.121 ± 0.039        |
| 51.71 | chr22:31779065-31976875   | 174254         | 2.080 ± 0.053        | 1.799 ± 0.048        | 2.117 ± 0.051        |
|       | <b>Subtotal</b>           | <b>904264</b>  | <b>2.190 ± 0.025</b> | <b>1.781 ± 0.023</b> | <b>2.141 ± 0.025</b> |

|       |                          |                 |                                     |                                     |                                     |
|-------|--------------------------|-----------------|-------------------------------------|-------------------------------------|-------------------------------------|
| 55.78 | chrX:122800129-122986208 | 294775          | $1.771 \pm 0.045$                   | $1.680 \pm 0.043$                   | $2.083 \pm 0.049$                   |
|       | <b>Subtotal</b>          | <b>294775</b>   | <b><math>1.771 \pm 0.045</math></b> | <b><math>1.680 \pm 0.043</math></b> | <b><math>2.083 \pm 0.049</math></b> |
|       | <b>Total</b>             | <b>15507060</b> | <b><math>2.205 \pm 0.007</math></b> | <b><math>2.010 \pm 0.007</math></b> | <b><math>2.199 \pm 0.007</math></b> |

---

Figure S5. Substitution Rate Variation

A.

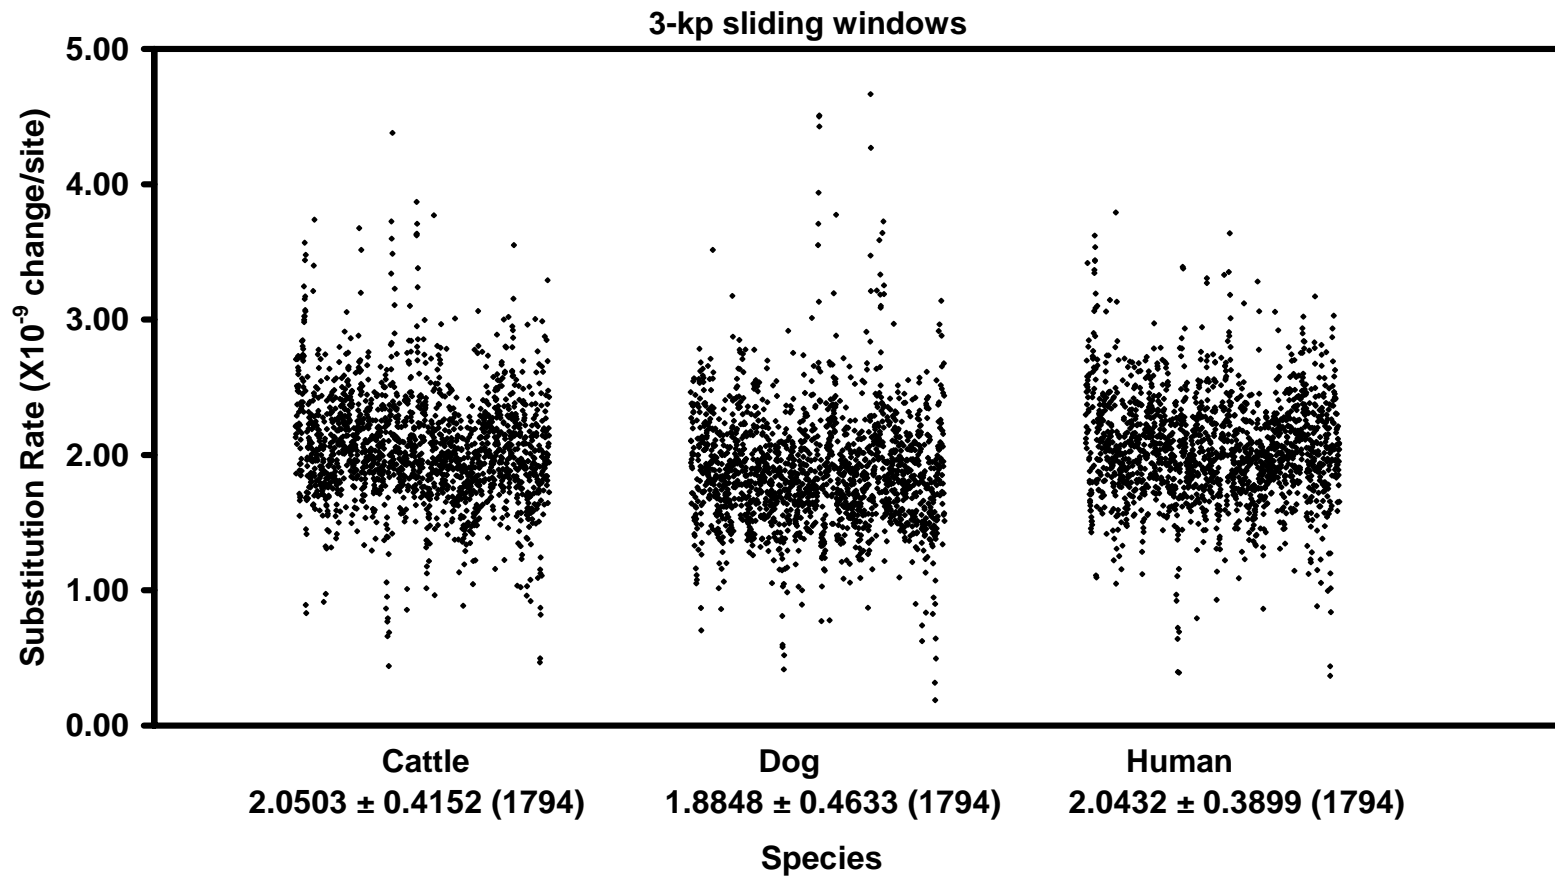

B.

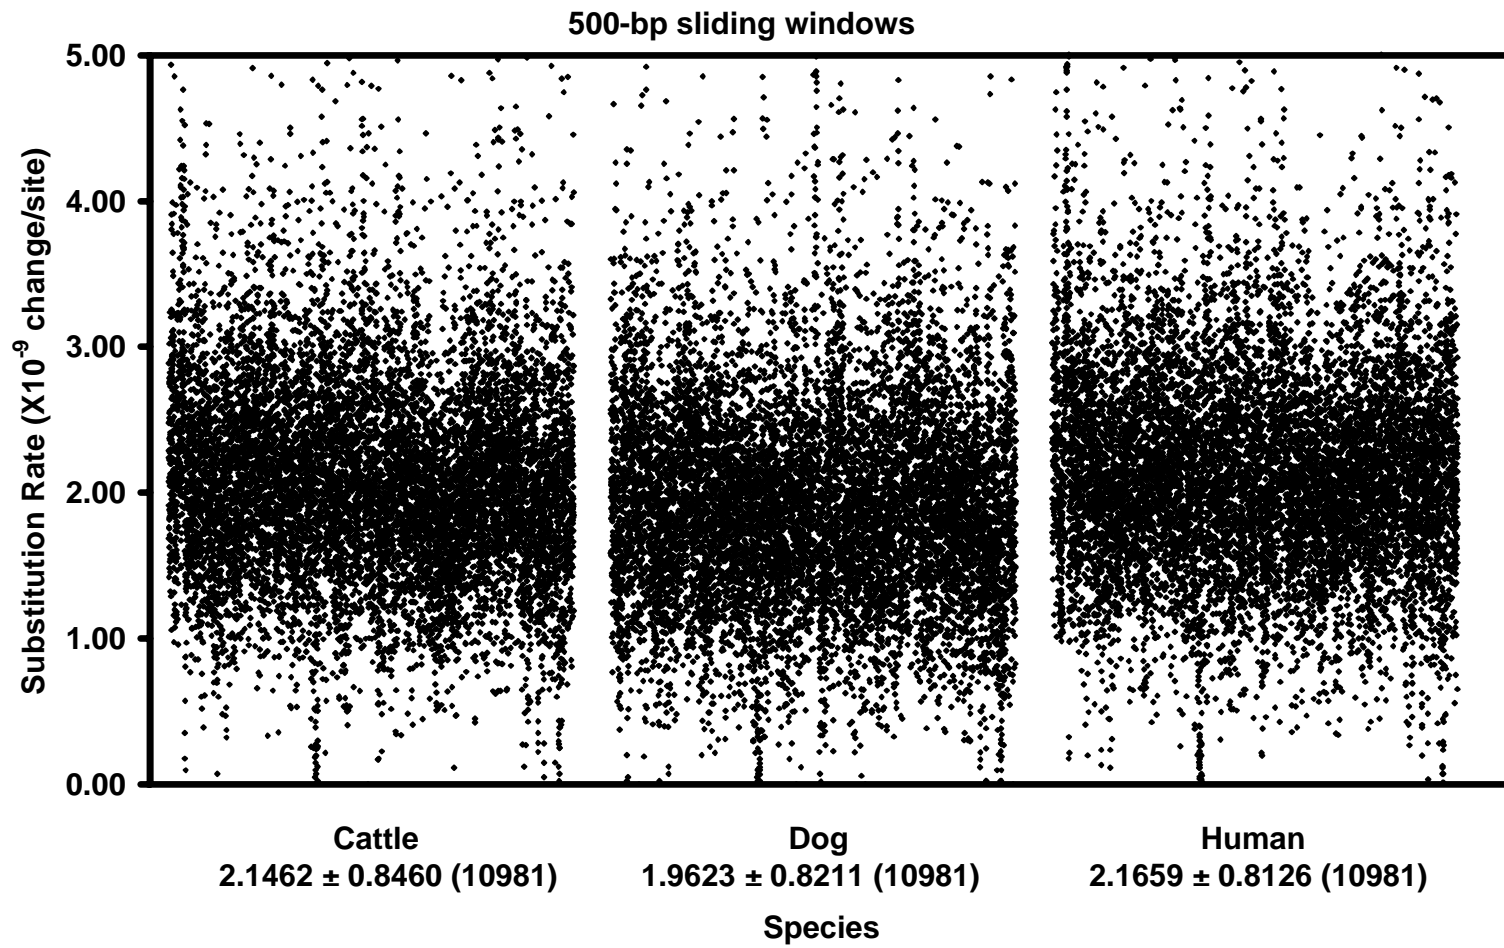

Supplement: 1471-2164-7-140-S1.pdf [file 1471-2164-7-140-S1.pdf]
